# Supplementary material
Source: PubMed Central journal article supplement (PMC6402950)
Supplement: mmc1.pdf [file mmc1.pdf]

YMTHE, Volume 27

## **Supplemental Information**

### **circRNA.33186 Contributes to the Pathogenesis of Osteoarthritis by Sponging miR-127-5p**

**Zhi-bin Zhou, Gao-xiang Huang, Qiang Fu, Bin Han, Jia-jia Lu, Ai-min Chen, and Lei Zhu**

**Supplementary Table S1 Base sequence of circRNA.33186.**

>circRNA.33186-536nt

gagctacagcaaatgaagtgagatgtaaaacttctgaagcagaaggcagccaggcttggaggtgagtttcagcttcagtc  
aggctactttccagtacatgaaacagatgacagaatggaccagcagcctgcttaactccccatctcttctgcacgctcagc  
tggatgttgttgaagttgatgttgtttcagctggagtgctgagaaaagaaaggcaagtggttcttgttcttcttcttcttc  
tctctcgtcctcttcttcttattctgtttcaagaaagatgggacaagcaggaaacacatgtagaccggcaaagaagac  
acatccagcgtgactgtatcaggccccgagacagagaatcagacaggccagactctgcagaacaactcactaacagctg  
agctcctgagcgatgtgcccttcaccctggccccacatgtgctggcggcacaggccaccatcagcgaccttctgaccac  
gtacttcatacagatgtcggcgacaactgtcccgattctg

The letters maked red and green indicate back splice junction.

**Supplementary Table S2 primers used for qRT-PCR in this study.**

|                      | <b>Forward primer</b>   | <b>Reverse primer</b>   |
|----------------------|-------------------------|-------------------------|
| <b>circRNA.33186</b> | ACTAACAGCTGAGTCCTGA     | CATTTGCTGTAGCTCCAGAATC  |
|                      | CCTTCCTGACCACGTACTCTC   | CGCTGCCTTTTCCTTACCTC    |
|                      | TGAGCTCCTGAGCGATGTG     | CGCCGACATCGTATGAGAGT    |
|                      | TCACTAACAGCTGAGTCCTG    | TCGCCGACATCGTATGAGAG    |
|                      | CCAGGCTTTGGAGGTAAGGA    | CGTGTGAGTTGTTGCTGTGAA   |
|                      | TGGAGGTAAGGAAAAGGCAGC   | AGTTGTTGCTGTGAATCAGCC   |
| <b>miR-127-5p</b>    | GCCGAGCTGAAGCTCAGAGG    | CTCAACTGGTGTCTGTGGA     |
| <b>Col2a1</b>        | ACCTTGACGCCATGAAA       | GTGGACAGTAGACGGAGGAA    |
| <b>MMP-13</b>        | GGAAGACCCTCTTCTTCTCT    | TCATAGACAGCATCTACTTTGTT |
| <b>GAPDH</b>         | TACCCCAATGTGTCCGTC      | GCCCAAGATGCCCTTCAGT     |
| <b>U6</b>            | CTCGCTTCGGCAGCACATATACT | ACGCTTCACGAATTTGCGTGTC  |

**Supplementary Table S3 sequence of siRNA targeting circRNA.33186.**

|         | Sequence             |
|---------|----------------------|
| si-RNA1 | CUGGAGCUACAGCAAUAAG  |
| si-RNA2 | ATTCUGGAGCUACAGCAAUG |
| si-RNA3 | TCUGGAGCUACAGCAAUGA  |
